# Supplementary material for: A role for the periplasmic adaptor protein AcrA in vetting substrate access to the RND efflux transporter AcrB
Source: PubMed Central journal article supplement (PMC8934357; doi:10.1038/s41598-022-08903-9), 2022-03-19
Supplement: 41598_2022_8903_MOESM1_ESM.pdf [file 41598_2022_8903_MOESM1_ESM.pdf]

## Supplementary Material

A role for the periplasmic adaptor protein AcrA in vetting  
substrate access to the RND efflux transporter AcrB

Ilyas Alav, Vassiliy N. Bavro, Jessica M. A. Blair

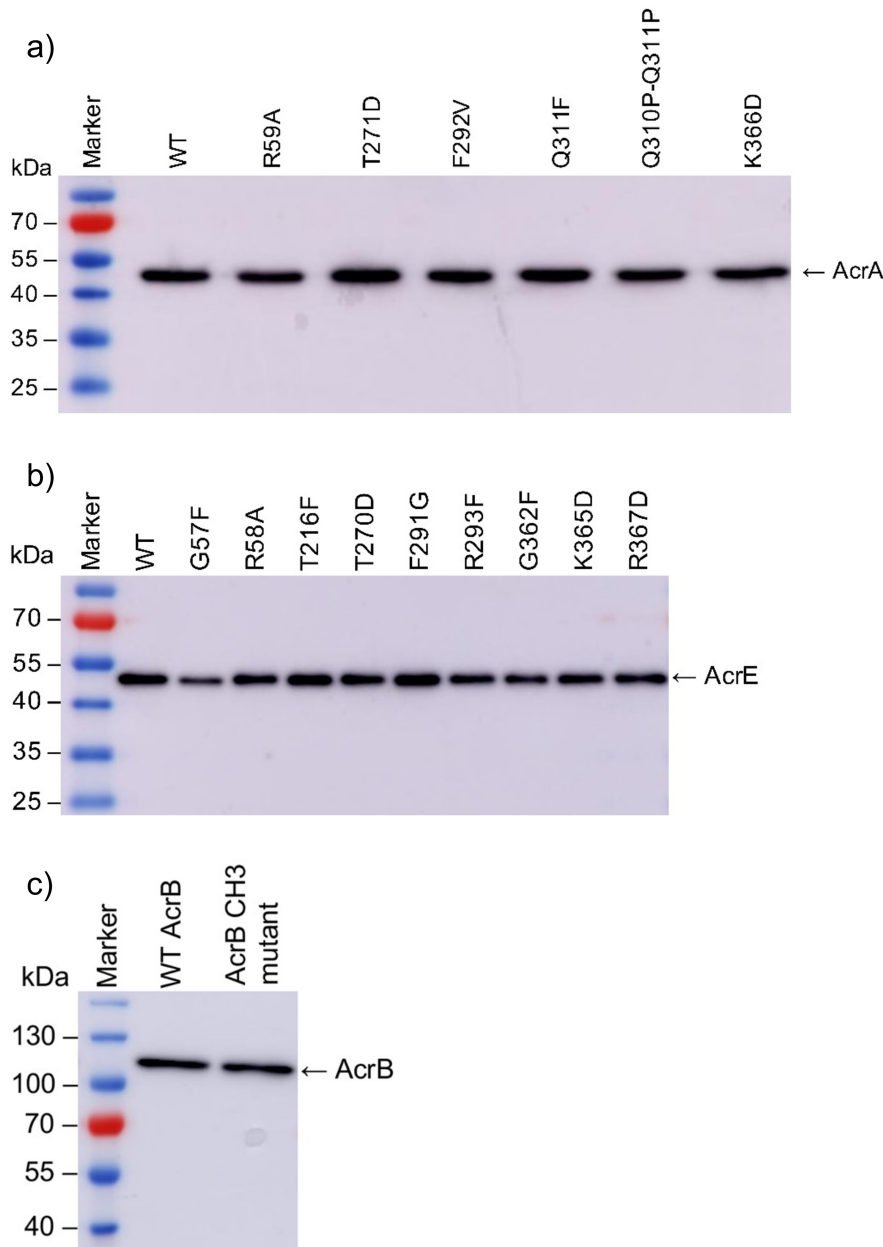

**Figure S1. Western blotting of mutant proteins.** **a)** Wild type and mutant AcrA were in expressed in the *Salmonella* Typhimurium SL1344  $\Delta$ 4PAP strain from *pacrA* plasmids. **b)** Wild type and mutant AcrE were in expressed in the *Salmonella* Typhimurium SL1344  $\Delta$ 4PAP  $\Delta$ *acrF* strain from *pacrE* plasmids. **c)** Wild type and the AcrB channel 3 (CH3) mutant (A33W T37W N298W) were in expressed in the *Salmonella* Typhimurium SL1344  $\Delta$ 4PAP  $\Delta$ *acrB* strain from *pacrAB* plasmids. Membrane fractions were harvested, separated on a 12% SDS-PAGE gel for AcrA and AcrE or 8% SDS-PAGE gel for AcrB, and transferred to a PVDF membrane. The His-tagged proteins were blotted using anti 6x-His tag HRP-conjugated monoclonal antibody and detected using ECL substrate. PageRuler Prestained Protein Ladder (Thermo Scientific, USA) was used as a molecular weight marker.

**Table S1.** List of primers used for site-directed mutagenesis reactions.

| Primer name        | Primer sequence                         |
|--------------------|-----------------------------------------|
| AcrA_R59A_F        | CTCCGGGTGCTACCGTTGCTTACCGTATC           |
| AcrA_R59A_R        | GCAACGGTAGCACCCGGAAGTTCAGTTGTG          |
| AcrA_T270A_F       | GTTGACCAAGCCACCGGGTCTATTACTTTG          |
| AcrA_T270A_R       | CCCGGTGGCTTGGTCAACGGTCACGTCGG           |
| AcrA_T270D_F       | GACCGTTGACCAAGACACCGGGTCTATTAC          |
| AcrA_T270D_R       | GACCCGGTGTCTTGGTCAACGGTCACGTCG          |
| AcrA_T271A_F       | GTTGACCAAACCGCCGGGTCTATTACTTTGC         |
| AcrA_T271A_R       | GTAATAGACCCGGCGGTTTTGGTCAACGGTC         |
| AcrA_T271D_F       | GTTGACCAAACCGACGGGTCTATTACTTTGC         |
| AcrA_T271D_R       | GTAATAGACCCGTGCGTTTTGGTCAACGGTC         |
| AcrA_G272A_S273A_F | CAAACCACCGCGGCTATTACTTTGCGCGCC          |
| AcrA_G272A_S273A_R | GTAATAGCCGCGGTGGTTTTGGTCAACGGTCAC       |
| AcrA_F292V_F       | CCAGGAATGGTCGTTCCGCGCACGTCTGC           |
| AcrA_F292V_R       | CGAACGACCATTCTGGCAATAAGGTGTG            |
| AcrA_Q310P_Q311P_F | CTGGTTCCACCACCGGGCGTTACCCGTACTC         |
| AcrA_Q310P_Q311P_R | GTAACGCCCGGTGGTGAACCAGTAATGCCG          |
| AcrA_Q311F_F       | GTTCCACAATTCCGGGTTACCCGTACTCC           |
| AcrA_Q311F_R       | GTAACGCCGAATTGTGGAACCAGTAATGC           |
| AcrA_P317G_F       | GTTACCCGTACTGGACGCGGCGATGCCAC           |
| AcrA_P317G_R       | TCGCCGCGTCCAGTACGGGTAACGCCCT            |
| AcrA_P317F_F       | GTTACCCGTACTTTCCGCGGCGATGCCACG          |
| AcrA_P317F_R       | CGCCGCGGAAAGTACGGGTAACGCCCTGTTG         |
| AcrA_R318F_F       | CGTACTCCATTCCGGCGATGCCACGGTGCTG         |
| AcrA_R318F_R       | CATCGCCGAATGGAGTACGGGTAACGCCCTG         |
| AcrA_I343F_G344F_F | GCCAGGCGTTCTTCGATAAGTGGCTGGTGAC         |
| AcrA_I343F_G344F_R | CACTTATCGAAGAACGCCTGGCTTGCACG           |
| AcrA_Q365F_F       | GCGGGCTGTTCAAAGTACGTCCTGGCGCAC          |
| AcrA_Q365F_R       | GACGTACTTTGAACAGCCCGCTGACGACTAC         |
| AcrA_K346A_F       | AGCCAGGCGATCGGCGATGCGTGGCTGGTG          |
| AcrA_K346A_R       | CACCAGCCACGCATCGCCGATCGCCTGGCT          |
| AcrA_K366D_F       | GGCTGCAAGATGTACGTCCTGGCGCACAGG          |
| AcrA_K366D_R       | GGACGTACATCTTGCAGCCCGCTGACGAC           |
| AcrA_R368A_F       | CAGCGGGCTGCAAAAAGTAGCTCCTGGCGCA         |
| AcrA_R368A_R       | TGCGCCAGGAGCTACTTTTTGCAGCCCGCTG         |
| AcrA_R368F_F       | GCAAAAAGTATTTCTGGCGCACAGGTTAAAG         |
| AcrA_R368F_R       | CGCCAGGAAATACTTTTTGCAGCCCGCTGAC         |
| AcrE_G57F_F        | GTAACGACCGAACTTCCCTTCCGTACGTCCGCATTTCCG |
| AcrE_G57F_R        | GCGAAATGCGGACGTACGGAAGGGAAGTTCGGTCGTTAC |

|              |                                                |
|--------------|------------------------------------------------|
| AcrE_R58A_F  | ACCGAACTTCCCGGAGCTACGTCCGCATTTTCG              |
| AcrE_R58A_R  | CGAAATGCGGACGTAGCTCCGGGAAGTTCGGT               |
| AcrE_T216F_F | CGATCCGATTTATGTGACGTGTTCCAATCAAGCAACGACTTTATGC |
| AcrE_T216F_F | GCATAAAGTCGTTGCTTGATTGGAACACGTGACATAAATCGGATCG |
| AcrE_T270D_F | GTTACCGTAGATGAAAGCGACGGCTCTATCACGCTCAG         |
| AcrE_T270D_R | CTGAGCGTGATAGAGCCGTCGCTTTCATCTACGGTAAC         |
| AcrE_F291G_F | CTGCTTCCCGGTATGGGTGTTTCGCGCCCGCAT              |
| AcrE_F291G_R | ATGCGGGCGCGAACACCCATAACCGGGAAGCAG              |
| AcrE_R293F_F | GTCTGCTTCCCGGTATGTTTGTTCGCGCCCGCATTGA          |
| AcrE_R293F_R | TCAATGCGGGCGAAAACAAACATAACCGGGAAGCAGAC         |
| AcrE_G362F_F | CGATAAGGTCATCGTCAGCTTCTTACAAAAGCGCGACCG        |
| AcrE_G362F_R | CGGTGCGGCTTTTTGTAAGAAGCTGACGATGACCTTATCG       |
| AcrE_K365D_F | CATCGTCAGCGGCTTACAAGATGCGCGACCGG               |
| AcrE_K365D_R | CCGGTCGCGCATCTTGTAAGCCGCTGACGATG               |
| AcrE_R367D_F | CGGCTTACAAAAGCGGATCCGGGCGTCCAGGTG              |
| AcrE_R367D_R | CACCTGGACGCCCGGATCCGCTTTTTGTAAGCCG             |
| AcrB_A33W_F  | GCGATCCTCAAATTGCCGGTATGGCAATATCCGACGAT         |
| AcrB_A33W_R  | ATCGTCGGATATTGCCATAACCGGCAATTTGAGGATCGC        |
| AcrB_T37W_F  | GGTATGGCAATATCCGTGGATTGCGCCACCAGCA             |
| AcrB_T37W_R  | TGCTGGTGGCGCAATCCACGGATATTGCCATACC             |
| AcrB_N298W_F | TGGTACCGGCGCCTGGGCGCTGGATACCGC                 |
| AcrB_N298W_R | GCGGTATCCAGCGCCAGGCGCCGGTAGCCA                 |

---

**Table S2.** Antimicrobial susceptibility of the *Salmonella* Typhimurium SL1344  $\Delta$ 4PAP strain complemented with mutated versions of AcrA.

| Strain        | Box no.      | MIC ( $\mu\text{g mL}^{-1}$ ) |            |           |           |            |           |            |            |            |            |
|---------------|--------------|-------------------------------|------------|-----------|-----------|------------|-----------|------------|------------|------------|------------|
|               |              | ACR                           | CLI        | CV        | DOX       | EtBr       | ERY       | FA         | MB         | NOV        | R6G        |
| WT            |              | 256                           | 256        | 64        | 512       | >1024      | 128       | 1024       | >1024      | 512        | >1024      |
| $\Delta$ 4PAP |              | 16                            | 2          | 2         | 2         | 16         | 2         | 4          | 8          | 1          | 8          |
| WT complement |              | <u>64</u>                     | <u>128</u> | <u>16</u> | <u>64</u> | <u>128</u> | <u>64</u> | <u>256</u> | <u>128</u> | <u>128</u> | <u>128</u> |
| R59A          | <b>1</b>     | <b>16</b>                     | <b>2</b>   | <b>2</b>  | <b>2</b>  | <b>32</b>  | <b>2</b>  | <b>4</b>   | <b>16</b>  | <b>2</b>   | <b>16</b>  |
| T270A         | 4            | 64                            | 128        | 16        | 64        | 128        | 64        | 256        | 128        | 128        | 128        |
| T270D         | 4            | 64                            | 128        | 16        | 64        | 128        | 64        | 256        | 128        | 128        | 128        |
| T271A         | 4            | 64                            | 16         | 8         | 32        | 64         | <b>8</b>  | <b>64</b>  | <b>32</b>  | <b>8</b>   | <b>32</b>  |
| T271D         | <b>4</b>     | <b>16</b>                     | <b>2</b>   | <b>2</b>  | <b>2</b>  | <b>16</b>  | <b>2</b>  | <b>4</b>   | <b>8</b>   | <b>1</b>   | <b>8</b>   |
| G272A-S273A   | 4            | 64                            | 128        | 16        | 64        | 128        | 64        | 256        | 128        | 128        | 128        |
| F292V         | <b>5</b>     | <b>16</b>                     | <b>2</b>   | <b>2</b>  | <b>2</b>  | <b>16</b>  | <b>2</b>  | <b>4</b>   | <b>8</b>   | <b>1</b>   | <b>8</b>   |
| Q310P-Q311P   | <b>pre-6</b> | <b>16</b>                     | <b>2</b>   | <b>2</b>  | <b>2</b>  | <b>16</b>  | <b>2</b>  | <b>4</b>   | <b>8</b>   | <b>1</b>   | <b>8</b>   |
| Q311F         | pre-6        | 64                            | 128        | 16        | 64        | 64         | 64        | 128        | 128        | 64         | 128        |
| P317G         | 6            | 64                            | 128        | 16        | 64        | 64         | 64        | 128        | 128        | 128        | 128        |
| P317F         | 6            | 64                            | 128        | 16        | 64        | 128        | 64        | 256        | 128        | 128        | 128        |
| R318F         | 6            | 64                            | 128        | 16        | 64        | 128        | 64        | 256        | 128        | 128        | 128        |
| I343F-G344F   | 8            | 64                            | 128        | 16        | 64        | 128        | 64        | 256        | 128        | 128        | 128        |
| K346A         | 8            | 64                            | 128        | 16        | 64        | 128        | 64        | 256        | 128        | 128        | 128        |
| Q365F         | 9            | 64                            | 128        | 16        | 64        | 128        | 64        | 256        | 128        | 128        | 64         |
| K366D         | 9            | 64                            | <b>16</b>  | 16        | <b>16</b> | 64         | <b>16</b> | <b>16</b>  | 128        | <b>16</b>  | 64         |
| R368F         | 9            | 64                            | 128        | 16        | 64        | 128        | 64        | 256        | 128        | 128        | 128        |

Underlined values highlight values for the  $\Delta$ 4PAP strain complemented with wild type AcrA (WT complement). Bold values are at least two-fold or more different than the parent strain. ACR, acriflavine; CLI, clindamycin; CV, crystal violet; DOX, doxorubicin; EtBr, ethidium bromide; ERY, erythromycin; FA, fusidic acid; MB, methylene blue; NOV, novobiocin; R6G, rhodamine 6G. Box no. indicates the mapping of the mutation to its binding box.

**Table S3.** Antimicrobial susceptibility of the *Salmonella* Typhimurium SL1344  $\Delta$ 4PAP  $\Delta$ *acrF* strain complemented with mutated versions of AcrE.

| Strain                             | Box no.  | MIC ( $\mu\text{g mL}^{-1}$ ) |           |            |            |           |            |                 |           |            |             |             |            |                 |  |
|------------------------------------|----------|-------------------------------|-----------|------------|------------|-----------|------------|-----------------|-----------|------------|-------------|-------------|------------|-----------------|--|
|                                    |          | ACR                           | BZK       | CHL        | CLI        | CV        | DOX        | EtBr            | ERY       | FA         | MB          | MIN         | NOV        | R6G             |  |
| WT                                 |          | 256                           | 64        | 4          | 512        | 64        | 1024       | >1024           | 64        | 1024       | 1024        | 1           | 512        | >1024           |  |
| $\Delta$ 4PAP $\Delta$ <i>acrF</i> |          | 16                            | 4         | 0.5        | 1          | 2         | 2          | 16              | 4         | 4          | 8           | 0.25        | 1          | 8               |  |
| WT complement                      |          | <u>256</u>                    | <u>64</u> | <u>4</u>   | <u>128</u> | <u>32</u> | <u>512</u> | <u>&gt;1024</u> | <u>64</u> | <u>512</u> | <u>1024</u> | <u>1</u>    | <u>512</u> | <u>&gt;1024</u> |  |
| G57F                               | <b>1</b> | <b>16</b>                     | <b>4</b>  | <b>0.5</b> | <b>4</b>   | <b>1</b>  | <b>2</b>   | <b>16</b>       | <b>4</b>  | <b>4</b>   | <b>8</b>    | <b>0.25</b> | <b>2</b>   | <b>8</b>        |  |
| R58A                               | <b>1</b> | <b>16</b>                     | <b>4</b>  | <b>0.5</b> | <b>4</b>   | <b>1</b>  | <b>2</b>   | <b>16</b>       | <b>4</b>  | <b>4</b>   | <b>8</b>    | <b>0.25</b> | <b>2</b>   | <b>8</b>        |  |
| T216F                              | 2        | 256                           | 64        | 4          | 128        | 32        | 512        | 1024            | 64        | 1024       | 1024        | 1           | 512        | 1024            |  |
| T270D                              | <b>4</b> | <b>16</b>                     | <b>4</b>  | <b>0.5</b> | <b>4</b>   | <b>1</b>  | <b>2</b>   | <b>16</b>       | <b>4</b>  | <b>8</b>   | <b>8</b>    | <b>0.25</b> | <b>1</b>   | <b>8</b>        |  |
| F291G                              | <b>5</b> | <b>16</b>                     | <b>4</b>  | <b>0.5</b> | <b>4</b>   | <b>2</b>  | <b>2</b>   | <b>16</b>       | <b>4</b>  | <b>8</b>   | <b>8</b>    | <b>0.25</b> | <b>1</b>   | <b>8</b>        |  |
| R293F                              | <b>5</b> | <b>16</b>                     | <b>8</b>  | <b>0.5</b> | <b>8</b>   | <b>2</b>  | <b>8</b>   | <b>64</b>       | <b>4</b>  | <b>32</b>  | <b>64</b>   | <b>0.25</b> | <b>16</b>  | <b>64</b>       |  |
| G362F                              | <b>9</b> | <b>32</b>                     | <b>8</b>  | <b>0.5</b> | <b>16</b>  | <b>2</b>  | <b>8</b>   | <b>64</b>       | <b>4</b>  | <b>32</b>  | <b>128</b>  | <b>0.25</b> | <b>16</b>  | <b>64</b>       |  |
| K365D                              | 9        | 128                           | 64        | 4          | 128        | 16        | 512        | 1024            | 64        | 256        | 1024        | 1           | 256        | 1024            |  |
| R367D                              | 9        | 256                           | 64        | 4          | 128        | 32        | 512        | 1024            | 64        | 512        | 1024        | 1           | 256        | 1024            |  |

Underlined values highlight values for the  $\Delta$ 4PAP  $\Delta$ *acrF* strain complemented with wild type AcrE (WT complement). Bold values are at least two-fold or more different than the parent strain. ACR, acriflavine; BZK, benzalkonium chloride; CHL, chloramphenicol; CLI, clindamycin; CV, crystal violet; DOX, doxorubicin; EtBr, ethidium bromide; ERY, erythromycin; FA, fusidic acid; MB, methylene blue; MIN, minocycline; NOV, novobiocin; R6G, rhodamine 6G. Box no. indicates the mapping of the mutation to its binding box.

**Table S4.** Antimicrobial susceptibility of the *Salmonella* Typhimurium SL1344  $\Delta$ 4PAP  $\Delta$ acrB strain complemented with K366D AcrA and the AcrB channel 3 mutation.

| Strain                         | MIC ( $\mu\text{g mL}^{-1}$ ) |           |            |           |            |           |           |            |            |            |  |
|--------------------------------|-------------------------------|-----------|------------|-----------|------------|-----------|-----------|------------|------------|------------|--|
|                                | HMMD                          |           |            |           | PAC        |           |           |            |            |            |  |
|                                | ERY                           | DOX       | FA         | NOV       | ACR        | BZK       | CV        | EtBr       | MB         | R6G        |  |
| WT                             | 128                           | 1024      | 1024       | 512       | 256        | 64        | 64        | >1024      | 1024       | >1024      |  |
| $\Delta$ 4PAP $\Delta$ acrB    | 4                             | 2         | 4          | 1         | 8          | 2         | 2         | 8          | 8          | 8          |  |
| WT AcrAB complement            | <u>64</u>                     | <u>64</u> | <u>128</u> | <u>64</u> | <u>128</u> | <u>32</u> | <u>16</u> | <u>256</u> | <u>256</u> | <u>128</u> |  |
| WT AcrA + AcrB CH3 mutation    | 16                            | 32        | 32         | 16        | 32         | 8         | 8         | 32         | 32         | 32         |  |
| K366D AcrA + WT AcrB           | 16                            | 16        | 16         | 16        | 128        | 32        | 16        | 128        | 128        | 64         |  |
| K366D AcrA + AcrB CH3 mutation | <b>4</b>                      | <b>2</b>  | <b>4</b>   | <b>1</b>  | <b>8</b>   | <b>2</b>  | <b>2</b>  | <b>8</b>   | <b>8</b>   | <b>8</b>   |  |

Underlined values highlight values for the  $\Delta$ 4PAP  $\Delta$ acrB strain complemented with WT AcrAB. Bold values highlight the MIC values of the  $\Delta$ 4PAP  $\Delta$ acrB strain complemented with K366D AcrA and the AcrB CH3 (A33W T37W N298W AcrB) mutation compared to its single mutation parent strains. HMMD, high-molecular-mass drugs; ERY, erythromycin; DOX, doxorubicin; FA, fusidic acid; NOV, novobiocin; PAC, planar aromatic cation; ACR, acriflavine; BZK, benzalkonium chloride; CV, crystal violet; EtBr, ethidium bromide; MB, methylene blue; R6G, rhodamine 6G.

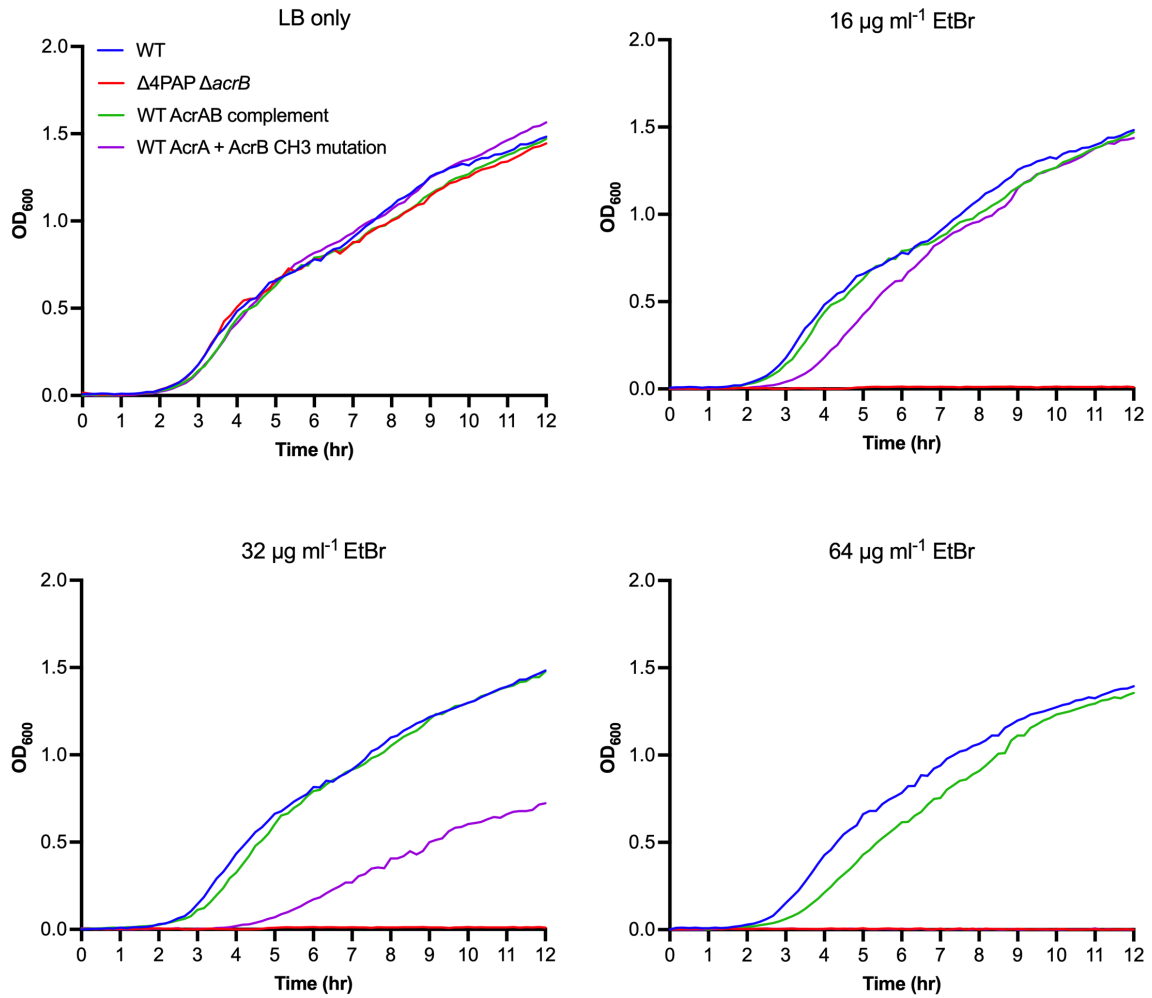

**Figure S2.** Growth kinetics of the *Salmonella Typhimurium* SL1344  $\Delta 4\text{PAP } \Delta \text{acrB}$  strain complemented with wild type AcrA and the AcrB channel 3 (CH3) mutation in various concentrations of ethidium bromide (EtBr). Data shown are the mean OD<sub>600</sub> values of three biological replicates. The AcrB CH3 mutation refers to A33W T37W N298W AcrB.



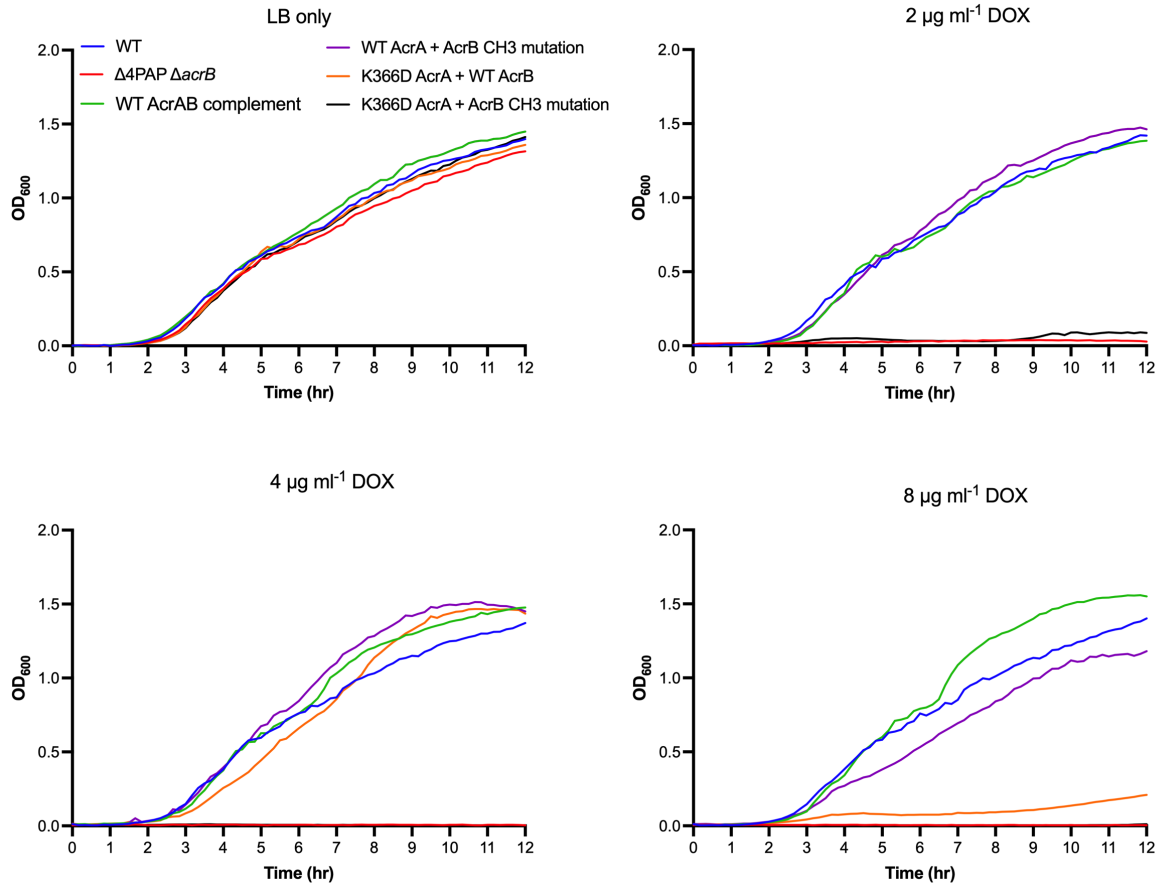

**Figure S3.** Growth kinetics of the *Salmonella Typhimurium* SL1344  $\Delta 4PAP \Delta acrB$  strain complemented with K366D AcrA and the AcrB channel 3 (CH3) mutation in various concentrations of doxorubicin (DOX). Data shown are the mean  $OD_{600}$  values of three biological replicates. The AcrB CH3 mutation refers to A33W T37W N298W AcrB.

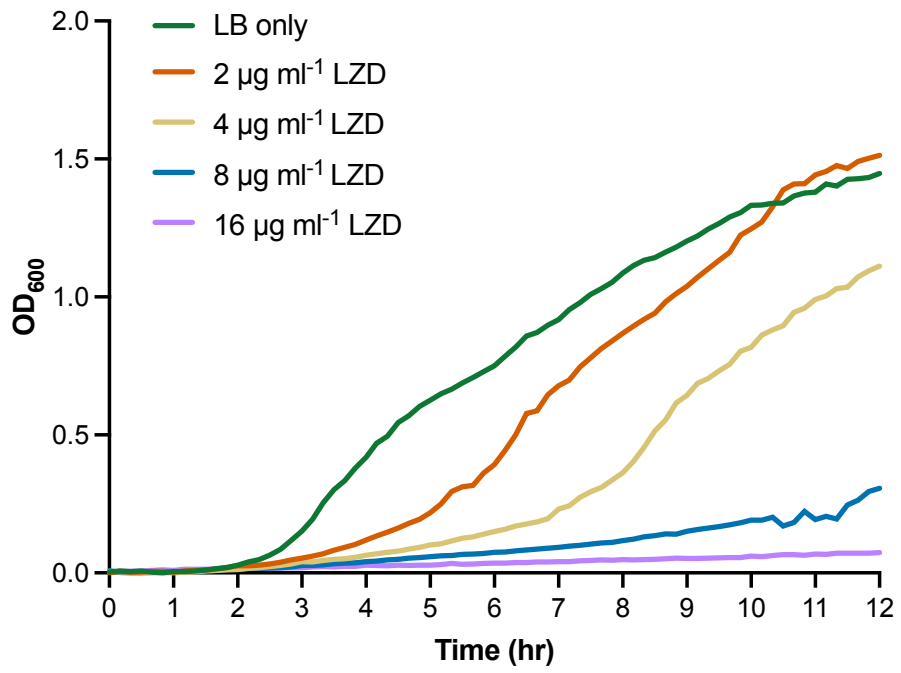

**Figure S4.** Growth kinetics of the *Salmonella* Typhimurium SL1344  $\Delta$ 4PAP strain complemented with the K366D AcrA mutation in various concentrations of linezolid (LZD). Data shown are the mean  $OD_{600}$  values of three biological replicates.
